# Supplementary material for: Lanthanide–uranyl phosphonates constructed from diethyl ((phenylsulfonyl)methyl)phosphonate
Source: Royal Society of Chemistry journal article supplement (doi:10.1039/d1dt03596g), 2021-12-07
Supplement: d1dt03596g1.pdf [file d1dt03596g1.pdf]

Supporting Information

# Lanthanide-uranyl Phosphonates Constructed from Diethyl ((phenylsulfonyl)methyl)phosphonate

Xiaomin Hou<sup>a</sup> and Si-Fu Tang<sup>\*b</sup>

<sup>a</sup>Shandong Province Key Laboratory of Applied Mycology, College of Life Science, Qingdao Agricultural University, Changcheng Road 700, Chengyang District, Qingdao 266109, China.

<sup>b</sup>College of Chemistry and Pharmaceutical Sciences, Qingdao Agricultural University, Changcheng Road 700, Chengyang District, Qingdao 266109, China.

**Materials and Instruments.** The ligand precursor, diethyl ((phenylsulfonyl)methyl)phosphonate (Et<sub>2</sub>L), was purchased from Aladin Chemicals. Other chemicals were purchased from commercial sources and used directly. Elemental analyses were performed on a Vario EL III elemental analyzer. Powder X-ray diffraction patterns (Figure S1-S5) were measured on a Bruker D8 Advance diffractometer using CuK $\alpha$  radiation. Compound **4** was soaked in in different solutions of varying pH=2-12 for 6 hours and recovered for the XRD measurements. IR spectra (Figure S6) were recorded in the range of 4000-400 cm<sup>-1</sup> on a Thermo Fisher Nicolet iS-10 FTIR Spectrometer with KBr pellets. Thermogravimetric analyses (TGA) were carried out on a NETZSCH STA 449C unit at a heating rate of 10 °C/min under nitrogen atmosphere. Fluorescent analyses of compounds **1**, **2**, **3** and **5** were performed on a HITACHI F-7000 FL spectrophotometer. The photophysical properties of compound **4** were measured on FLS-1000 spectrophotometer. The UV-Vis spectra of compounds **1-5** were recorded on HITACHI U-3900 spectrophotometer.

**Single-Crystal Structure Determination.** The diffraction intensity data sets of compounds **1-5** were collected on a Bruker SMART APEX II CCD diffractometer (Mo K $\alpha$  radiation,  $\lambda$ = 0.71073 Å) at room temperature. SAINT was used for integration of intensity of reflections and scaling<sup>1</sup>. Absorption corrections were carried out with the program SADABS<sup>2</sup>. Crystal structures were solved by direct methods using SHELXS<sup>3</sup>. Subsequent difference Fourier analyses and least squares refinement with SHELXL-2013<sup>4</sup> allowed for the location of the atom positions. All non-hydrogen atoms were refined with anisotropic thermal parameters except O1, O2, O6, O7, C9, C10, C11, C15, C16, C17, C18 and C19 in compound **2**, C17, C18, C19 and C20 in compounds **4** and **5**. The crystal structure of compound **3** is a twin. It was refined on the data in HKLF5 format with SHELXL-2013 using TWIN and BASF

commands. The high residue peaks around  $Sm1$  are meaningless. The crystallographic details are summarized in Table S1. The data have been deposited in the Cambridge Crystallographic Data Centre (CCDC), deposition numbers CCDC 2092516-2092520 for compounds **1-5**. These data can be obtained free of charge via [www.ccdc.cam.ac.uk/data\\_request/cif](http://www.ccdc.cam.ac.uk/data_request/cif), or by emailing [data\\_request@ccdc.cam.ac.uk](mailto:data_request@ccdc.cam.ac.uk), or by contacting The Cambridge Crystallographic Data Centre, 12, Union Road, Cambridge CB2 1EZ, UK; fax: +44 1223 336033.

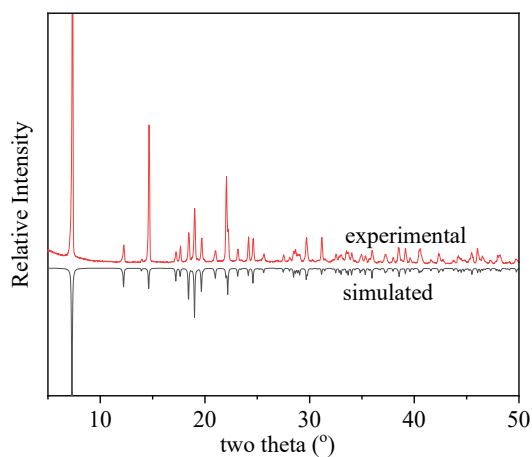

**Figure S1** Simulated and experimental XRD patterns of compound **1**.

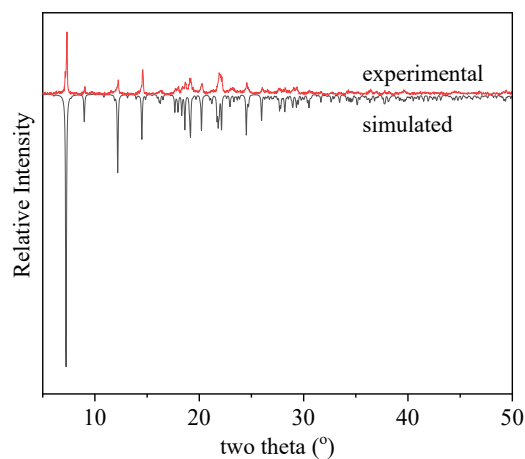

**Figure S2** Simulated and experimental XRD patterns of compound **2**.

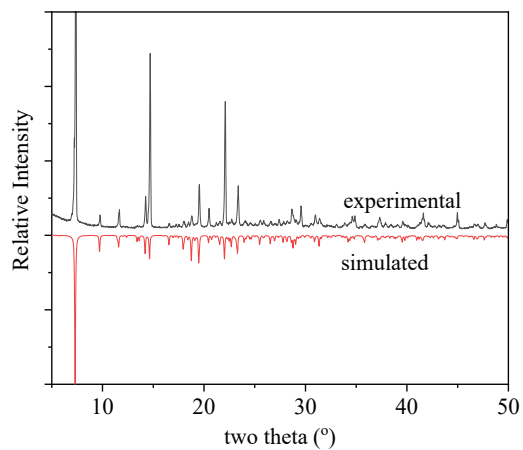

**Figure S3** Simulated and experimental XRD patterns of compound **3**.

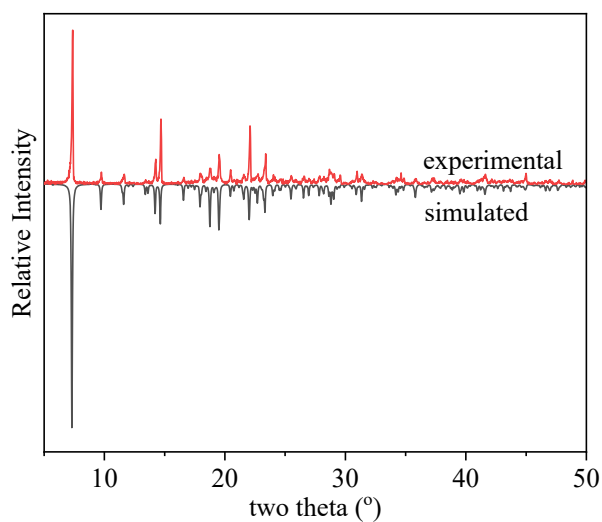

**Figure S4** Simulated and experimental XRD patterns of compound **4**.

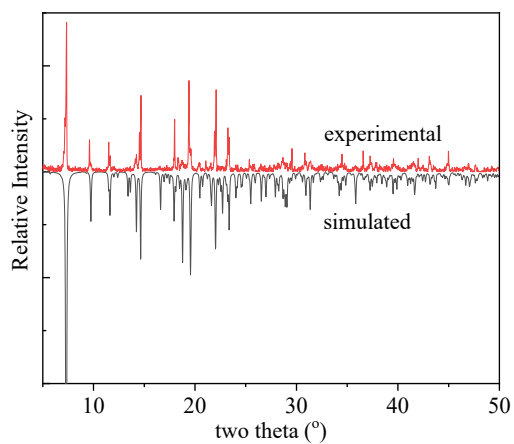

**Figure S5** Simulated and experimental XRD patterns of compound **5**.

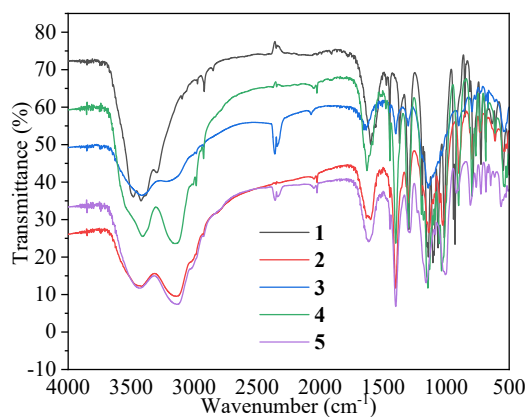

**Figure S6** IR spectra of compounds **1-5**.

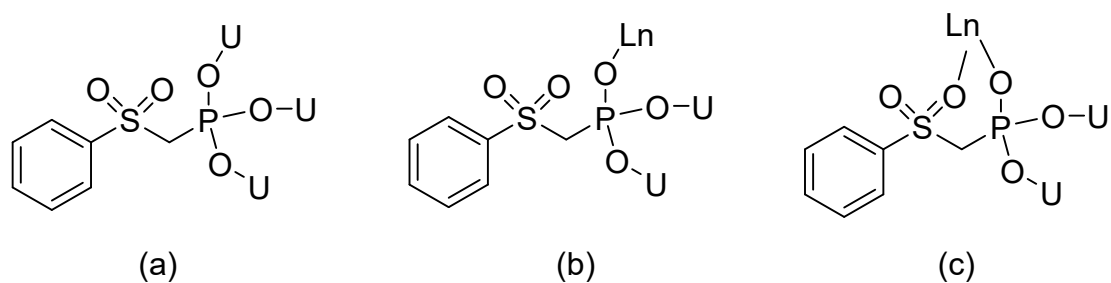

**Scheme S1.** Coordination modes of the ligand in compounds **1-5**.

**Table S1.** Selected bonds (Å) of compounds **1-5**.

| <b>Compound 1</b> |           |              |           |
|-------------------|-----------|--------------|-----------|
| U(1)-O(7)         | 1.756(4)  | U(1)-O(2)#2  | 2.356(3)  |
| U(1)-O(6)         | 1.759(4)  | U(1)-O(1W)   | 2.471(4)  |
| U(1)-O(1)#1       | 2.320(3)  | U(1)-O(2W)   | 2.493(4)  |
| U(1)-O(3)         | 2.344(3)  |              |           |
| <b>Compound 2</b> |           |              |           |
| U(1)-O(18)        | 1.779(10) | U(2)-O(10)#2 | 2.269(10) |
| U(1)-O(18)#1      | 1.779(11) | U(2)-O(9)    | 2.302(10) |
| U(1)-O(3)#1       | 2.262(12) | La(1)-O(8)#2 | 2.381(10) |
| U(1)-O(3)         | 2.262(12) | La(1)-O(4)#3 | 2.404(11) |
| U(1)-O(14)#1      | 2.275(10) | La(1)-O(15)  | 2.410(11) |
| U(1)-O(14)        | 2.275(10) | La(1)-O(4W)  | 2.515(13) |
| U(2)-O(17)        | 1.786(11) | La(1)-O(1W)  | 2.557(12) |
| U(2)-O(16)        | 1.788(11) | La(1)-O(3W)  | 2.570(12) |
| U(2)-O(13)        | 2.243(11) | La(1)-O(12)  | 2.667(12) |
| U(2)-O(5)         | 2.258(10) | La(1)-O(2W)  | 2.693(12) |

| <b>Compound 3</b> |          |               |          |
|-------------------|----------|---------------|----------|
| U(1)-O(16)#1      | 1.789(7) | U(2)-O(3)#4   | 2.258(7) |
| U(1)-O(16)        | 1.789(7) | U(2)-O(4)     | 2.296(7) |
| U(1)-O(9)#1       | 2.272(7) | Sm(1)-O(10)   | 2.296(7) |
| U(1)-O(9)         | 2.272(7) | Sm(1)-O(5)    | 2.309(7) |
| U(1)-O(14)#2      | 2.285(7) | Sm(1)-O(13)#4 | 2.341(7) |
| U(1)-O(14)#3      | 2.285(7) | Sm(1)-O(2W)   | 2.420(8) |
| U(2)-O(18)        | 1.780(7) | Sm(1)-O(1W)   | 2.470(8) |
| U(2)-O(17)        | 1.788(7) | Sm(1)-O(3W)   | 2.479(8) |
| U(2)-O(15)        | 2.235(8) | Sm(1)-O(12)#4 | 2.563(8) |
| U(2)-O(8)#3       | 2.250(7) | Sm(1)-O(4W)   | 2.576(7) |
| <b>Compound 4</b> |          |               |          |
| U(1)-O(16)        | 1.777(5) | U(2)-O(3)#4   | 2.259(5) |
| U(1)-O(16)#1      | 1.777(5) | U(2)-O(4)     | 2.297(5) |
| U(1)-O(9)         | 2.270(5) | Eu(1)-O(5)    | 2.290(5) |
| U(1)-O(9)#1       | 2.270(5) | Eu(1)-O(10)   | 2.297(5) |
| U(1)-O(14)#2      | 2.286(5) | Eu(1)-O(13)#4 | 2.335(5) |
| U(1)-O(14)#3      | 2.286(5) | Eu(1)-O(2W)   | 2.394(5) |
| U(2)-O(18)        | 1.781(5) | Eu(1)-O(3W)   | 2.461(5) |
| U(2)-O(17)        | 1.786(5) | Eu(1)-O(1W)   | 2.465(5) |
| U(2)-O(15)        | 2.231(5) | Eu(1)-O(12)#4 | 2.558(5) |
| U(2)-O(8)#3       | 2.255(5) | Eu(1)-O(4W)   | 2.567(5) |
| <b>Compound 5</b> |          |               |          |
| U(1)-O(16)#1      | 1.785(6) | U(2)-O(8)#3   | 2.256(6) |
| U(1)-O(16)        | 1.785(6) | U(2)-O(4)     | 2.295(5) |
| U(1)-O(9)#1       | 2.276(5) | Tb(1)-O(5)    | 2.261(6) |
| U(1)-O(9)         | 2.276(5) | Tb(1)-O(10)   | 2.267(6) |
| U(1)-O(14)#2      | 2.279(5) | Tb(1)-O(13)#4 | 2.304(5) |
| U(1)-O(14)#3      | 2.279(5) | Tb(1)-O(2W)   | 2.366(6) |
| U(2)-O(17)        | 1.787(6) | Tb(1)-O(3W)   | 2.433(6) |
| U(2)-O(18)        | 1.788(6) | Tb(1)-O(1W)   | 2.435(6) |
| U(2)-O(15)        | 2.228(6) | Tb(1)-O(12)#4 | 2.548(6) |
| U(2)-O(3)#4       | 2.254(5) | Tb(1)-O(4W)   | 2.555(6) |

Symmetry transformations used to generate equivalent atoms: for **1**: #1 -x+2, -y+1, -z; #2 x, -y+1/2, z+1/2. For **2**: #1 -x, -y, -z+1; #2 -x, -y, -z+2; #3 x+1, y, z. For **3-5**: #1 -x+3, -y+1, -z+3; #2 x+1, y, z+1; #3 -x+2, -y+1, -z+2; #4 -x+2, -y+1, -z+1.

Table S2. Selected angles (°) in compounds **1-5**.

| <b>Compound 1</b> |            |                   |            |
|-------------------|------------|-------------------|------------|
| O(7)-U(1)-O(6)    | 178.79(16) | O(6)-U(1)-O(1W)   | 93.04(16)  |
| O(7)-U(1)-O(1)#1  | 91.13(15)  | O(1)#1-U(1)-O(1W) | 72.24(12)  |
| O(6)-U(1)-O(1)#1  | 88.74(16)  | O(3)-U(1)-O(1W)   | 151.65(13) |

|                      |            |                     |            |
|----------------------|------------|---------------------|------------|
| O(7)-U(1)-O(3)       | 87.93(15)  | O(2)#2-U(1)-O(1W)   | 71.58(12)  |
| O(6)-U(1)-O(3)       | 90.86(15)  | O(7)-U(1)-O(2W)     | 89.95(16)  |
| O(1)#1-U(1)-O(3)     | 79.80(12)  | O(6)-U(1)-O(2W)     | 89.56(16)  |
| O(7)-U(1)-O(2)#2     | 90.93(15)  | O(1)#1-U(1)-O(2W)   | 150.33(12) |
| O(6)-U(1)-O(2)#2     | 89.88(15)  | O(3)-U(1)-O(2W)     | 70.61(12)  |
| O(1)#1-U(1)-O(2)#2   | 143.66(12) | O(2)#2-U(1)-O(2W)   | 65.94(12)  |
| O(3)-U(1)-O(2)#2     | 136.54(12) | O(1W)-U(1)-O(2W)    | 137.43(12) |
| O(7)-U(1)-O(1W)      | 88.07(15)  |                     |            |
| <b>Compound 2</b>    |            |                     |            |
| O(18)-U(1)-O(18)#1   | 180.0(10)  | O(10)#2-U(2)-O(9)   | 92.6(4)    |
| O(18)-U(1)-O(3)#1    | 89.9(4)    | O(8)#2-La(1)-O(4)#3 | 144.6(4)   |
| O(18)#1-U(1)-O(3)#1  | 90.1(4)    | O(8)#2-La(1)-O(15)  | 102.0(4)   |
| O(18)-U(1)-O(3)      | 90.1(4)    | O(4)#3-La(1)-O(15)  | 96.5(4)    |
| O(18)#1-U(1)-O(3)    | 89.9(4)    | O(8)#2-La(1)-O(4W)  | 83.6(4)    |
| O(3)#1-U(1)-O(3)     | 180.0(5)   | O(4)#3-La(1)-O(4W)  | 100.9(4)   |
| O(18)-U(1)-O(14)#1   | 90.3(4)    | O(15)-La(1)-O(4W)   | 140.5(4)   |
| O(18)#1-U(1)-O(14)#1 | 89.7(4)    | O(8)#2-La(1)-O(1W)  | 77.2(4)    |
| O(3)#1-U(1)-O(14)#1  | 93.5(4)    | O(4)#3-La(1)-O(1W)  | 78.7(4)    |
| O(3)-U(1)-O(14)#1    | 86.5(4)    | O(15)-La(1)-O(1W)   | 75.3(4)    |
| O(18)-U(1)-O(14)     | 89.7(4)    | O(4W)-La(1)-O(1W)   | 142.8(5)   |
| O(18)#1-U(1)-O(14)   | 90.3(4)    | O(8)#2-La(1)-O(3W)  | 140.0(4)   |
| O(3)#1-U(1)-O(14)    | 86.5(4)    | O(4)#3-La(1)-O(3W)  | 73.9(4)    |
| O(3)-U(1)-O(14)      | 93.5(4)    | O(15)-La(1)-O(3W)   | 75.2(4)    |
| O(14)#1-U(1)-O(14)   | 180.0(4)   | O(4W)-La(1)-O(3W)   | 76.0(5)    |
| O(17)-U(2)-O(16)     | 179.1(6)   | O(1W)-La(1)-O(3W)   | 136.7(4)   |
| O(17)-U(2)-O(13)     | 91.4(5)    | O(8)#2-La(1)-O(12)  | 72.9(4)    |
| O(16)-U(2)-O(13)     | 89.4(5)    | O(4)#3-La(1)-O(12)  | 142.3(4)   |
| O(17)-U(2)-O(5)      | 90.5(5)    | O(15)-La(1)-O(12)   | 71.2(4)    |
| O(16)-U(2)-O(5)      | 89.2(5)    | O(4W)-La(1)-O(12)   | 73.4(4)    |
| O(13)-U(2)-O(5)      | 87.3(4)    | O(1W)-La(1)-O(12)   | 128.5(4)   |
| O(17)-U(2)-O(10)#2   | 89.1(5)    | O(3W)-La(1)-O(12)   | 68.5(4)    |
| O(16)-U(2)-O(10)#2   | 91.2(4)    | O(8)#2-La(1)-O(2W)  | 73.1(4)    |
| O(13)-U(2)-O(10)#2   | 90.3(4)    | O(4)#3-La(1)-O(2W)  | 74.1(5)    |
| O(5)-U(2)-O(10)#2    | 177.6(4)   | O(15)-La(1)-O(2W)   | 143.9(4)   |
| O(17)-U(2)-O(9)      | 87.7(5)    | O(4W)-La(1)-O(2W)   | 75.4(5)    |
| O(16)-U(2)-O(9)      | 91.5(5)    | O(1W)-La(1)-O(2W)   | 68.7(5)    |
| O(13)-U(2)-O(9)      | 176.8(4)   | O(3W)-La(1)-O(2W)   | 131.5(4)   |
| O(5)-U(2)-O(9)       | 89.7(4)    | O(12)-La(1)-O(2W)   | 135.7(5)   |
| <b>Compound 3</b>    |            |                     |            |
| O(16)#1-U(1)-O(16)   | 180.0      | O(3)#4-U(2)-O(4)    | 94.1(3)    |
| O(16)#1-U(1)-O(9)#1  | 89.3(3)    | O(10)-Sm(1)-O(5)    | 143.7(3)   |
| O(16)-U(1)-O(9)#1    | 90.7(3)    | O(10)-Sm(1)-O(13)#4 | 97.9(3)    |
| O(16)#1-U(1)-O(9)    | 90.7(3)    | O(5)-Sm(1)-O(13)#4  | 100.3(3)   |

|                      |           |                       |            |
|----------------------|-----------|-----------------------|------------|
| O(16)-U(1)-O(9)      | 89.3(3)   | O(10)-Sm(1)-O(2W)     | 100.4(3)   |
| O(9)#1-U(1)-O(9)     | 180.0     | O(5)-Sm(1)-O(2W)      | 85.4(3)    |
| O(16)#1-U(1)-O(14)#2 | 90.8(3)   | O(13)#4-Sm(1)-O(2W)   | 139.6(3)   |
| O(16)-U(1)-O(14)#2   | 89.2(3)   | O(10)-Sm(1)-O(1W)     | 74.3(3)    |
| O(9)#1-U(1)-O(14)#2  | 92.9(3)   | O(5)-Sm(1)-O(1W)      | 140.9(3)   |
| O(9)-U(1)-O(14)#2    | 87.1(3)   | O(13)#4-Sm(1)-O(1W)   | 75.1(3)    |
| O(16)#1-U(1)-O(14)#3 | 89.2(3)   | O(2W)-Sm(1)-O(1W)     | 75.7(3)    |
| O(16)-U(1)-O(14)#3   | 90.8(3)   | O(10)-Sm(1)-O(3W)     | 77.5(3)    |
| O(9)#1-U(1)-O(14)#3  | 87.1(3)   | O(5)-Sm(1)-O(3W)      | 76.7(3)    |
| O(9)-U(1)-O(14)#3    | 92.9(3)   | O(13)#4-Sm(1)-O(3W)   | 76.3(3)    |
| O(14)#2-U(1)-O(14)#3 | 180.0     | O(2W)-Sm(1)-O(3W)     | 142.9(3)   |
| O(18)-U(2)-O(17)     | 179.1(4)  | O(1W)-Sm(1)-O(3W)     | 136.1(3)   |
| O(18)-U(2)-O(15)     | 89.6(4)   | O(10)-Sm(1)-O(12)#4   | 143.5(3)   |
| O(17)-U(2)-O(15)     | 90.8(4)   | O(5)-Sm(1)-O(12)#4    | 72.4(3)    |
| O(18)-U(2)-O(8)#3    | 91.0(3)   | O(13)#4-Sm(1)-O(12)#4 | 72.5(3)    |
| O(17)-U(2)-O(8)#3    | 89.8(3)   | O(2W)-Sm(1)-O(12)#4   | 71.3(3)    |
| O(15)-U(2)-O(8)#3    | 86.2(3)   | O(1W)-Sm(1)-O(12)#4   | 69.3(3)    |
| O(18)-U(2)-O(3)#4    | 88.9(3)   | O(3W)-Sm(1)-O(12)#4   | 130.6(3)   |
| O(17)-U(2)-O(3)#4    | 90.3(3)   | O(10)-Sm(1)-O(4W)     | 74.7(3)    |
| O(15)-U(2)-O(3)#4    | 91.1(3)   | O(5)-Sm(1)-O(4W)      | 72.6(3)    |
| O(8)#3-U(2)-O(3)#4   | 177.4(3)  | O(13)#4-Sm(1)-O(4W)   | 145.7(3)   |
| O(18)-U(2)-O(4)      | 87.2(3)   | O(2W)-Sm(1)-O(4W)     | 74.3(3)    |
| O(17)-U(2)-O(4)      | 92.6(3)   | O(1W)-Sm(1)-O(4W)     | 131.4(2)   |
| O(15)-U(2)-O(4)      | 173.8(3)  | O(3W)-Sm(1)-O(4W)     | 69.5(3)    |
| O(8)#3-U(2)-O(4)     | 88.5(3)   | O(12)#4-Sm(1)-O(4W)   | 132.1(3)   |
| <b>Compound 4</b>    |           |                       |            |
| O(16)-U(1)-O(16)#1   | 180.0(2)  | O(3)#4-U(2)-O(4)      | 94.17(17)  |
| O(16)-U(1)-O(9)      | 89.7(2)   | O(5)-Eu(1)-O(10)      | 143.87(19) |
| O(16)#1-U(1)-O(9)    | 90.3(2)   | O(5)-Eu(1)-O(13)#4    | 100.00(18) |
| O(16)-U(1)-O(9)#1    | 90.3(2)   | O(10)-Eu(1)-O(13)#4   | 98.26(18)  |
| O(16)#1-U(1)-O(9)#1  | 89.7(2)   | O(5)-Eu(1)-O(2W)      | 85.57(19)  |
| O(9)-U(1)-O(9)#1     | 180.0     | O(10)-Eu(1)-O(2W)     | 99.99(18)  |
| O(16)-U(1)-O(14)#2   | 89.2(2)   | O(13)#4-Eu(1)-O(2W)   | 139.81(18) |
| O(16)#1-U(1)-O(14)#2 | 90.8(2)   | O(5)-Eu(1)-O(3W)      | 77.45(18)  |
| O(9)-U(1)-O(14)#2    | 87.23(18) | O(10)-Eu(1)-O(3W)     | 77.15(18)  |
| O(9)#1-U(1)-O(14)#2  | 92.77(18) | O(13)#4-Eu(1)-O(3W)   | 75.92(18)  |
| O(16)-U(1)-O(14)#3   | 90.8(2)   | O(2W)-Eu(1)-O(3W)     | 143.2(2)   |
| O(16)#1-U(1)-O(14)#3 | 89.2(2)   | O(5)-Eu(1)-O(1W)      | 140.83(18) |
| O(9)-U(1)-O(14)#3    | 92.77(18) | O(10)-Eu(1)-O(1W)     | 74.20(19)  |
| O(9)#1-U(1)-O(14)#3  | 87.23(18) | O(13)#4-Eu(1)-O(1W)   | 75.24(19)  |
| O(14)#2-U(1)-O(14)#3 | 180.0     | O(2W)-Eu(1)-O(1W)     | 75.79(19)  |
| O(18)-U(2)-O(17)     | 179.1(2)  | O(3W)-Eu(1)-O(1W)     | 135.41(19) |
| O(18)-U(2)-O(15)     | 89.4(2)   | O(5)-Eu(1)-O(12)#4    | 72.17(18)  |

|                      |            |                       |            |
|----------------------|------------|-----------------------|------------|
| O(17)-U(2)-O(15)     | 90.9(2)    | O(10)-Eu(1)-O(12)#4   | 143.50(19) |
| O(18)-U(2)-O(8)#3    | 90.9(2)    | O(13)#4-Eu(1)-O(12)#4 | 72.86(17)  |
| O(17)-U(2)-O(8)#3    | 90.0(2)    | O(2W)-Eu(1)-O(12)#4   | 71.17(17)  |
| O(15)-U(2)-O(8)#3    | 85.85(19)  | O(3W)-Eu(1)-O(12)#4   | 131.14(18) |
| O(18)-U(2)-O(3)#4    | 88.9(2)    | O(1W)-Eu(1)-O(12)#4   | 69.29(18)  |
| O(17)-U(2)-O(3)#4    | 90.3(2)    | O(5)-Eu(1)-O(4W)      | 72.55(17)  |
| O(15)-U(2)-O(3)#4    | 91.00(18)  | O(10)-Eu(1)-O(4W)     | 74.80(19)  |
| O(8)#3-U(2)-O(3)#4   | 176.85(18) | O(13)#4-Eu(1)-O(4W)   | 145.74(18) |
| O(18)-U(2)-O(4)      | 87.4(2)    | O(2W)-Eu(1)-O(4W)     | 74.02(18)  |
| O(17)-U(2)-O(4)      | 92.3(2)    | O(3W)-Eu(1)-O(4W)     | 69.82(18)  |
| O(15)-U(2)-O(4)      | 173.88(18) | O(1W)-Eu(1)-O(4W)     | 131.54(17) |
| O(8)#3-U(2)-O(4)     | 88.96(18)  | O(12)#4-Eu(1)-O(4W)   | 131.56(18) |
| <b>Compound 5</b>    |            |                       |            |
| O(16)#1-U(1)-O(16)   | 180.0      | O(8)#3-U(2)-O(4)      | 89.1(2)    |
| O(16)#1-U(1)-O(9)#1  | 89.7(2)    | O(5)-Tb(1)-O(10)      | 143.8(2)   |
| O(16)-U(1)-O(9)#1    | 90.3(2)    | O(5)-Tb(1)-O(13)#4    | 100.0(2)   |
| O(16)#1-U(1)-O(9)    | 90.3(2)    | O(10)-Tb(1)-O(13)#4   | 98.6(2)    |
| O(16)-U(1)-O(9)      | 89.7(2)    | O(5)-Tb(1)-O(2W)      | 85.5(2)    |
| O(9)#1-U(1)-O(9)     | 180.0      | O(10)-Tb(1)-O(2W)     | 99.5(2)    |
| O(16)#1-U(1)-O(14)#2 | 90.8(2)    | O(13)#4-Tb(1)-O(2W)   | 140.1(2)   |
| O(16)-U(1)-O(14)#2   | 89.2(2)    | O(5)-Tb(1)-O(3W)      | 78.0(2)    |
| O(9)#1-U(1)-O(14)#2  | 93.0(2)    | O(10)-Tb(1)-O(3W)     | 76.7(2)    |
| O(9)-U(1)-O(14)#2    | 87.0(2)    | O(13)#4-Tb(1)-O(3W)   | 76.3(2)    |
| O(16)#1-U(1)-O(14)#3 | 89.2(2)    | O(2W)-Tb(1)-O(3W)     | 142.6(2)   |
| O(16)-U(1)-O(14)#3   | 90.8(2)    | O(5)-Tb(1)-O(1W)      | 140.8(2)   |
| O(9)#1-U(1)-O(14)#3  | 87.0(2)    | O(10)-Tb(1)-O(1W)     | 74.1(2)    |
| O(9)-U(1)-O(14)#3    | 93.0(2)    | O(13)#4-Tb(1)-O(1W)   | 75.3(2)    |
| O(14)#2-U(1)-O(14)#3 | 180.0      | O(2W)-Tb(1)-O(1W)     | 76.0(2)    |
| O(17)-U(2)-O(18)     | 179.2(3)   | O(3W)-Tb(1)-O(1W)     | 135.2(2)   |
| O(17)-U(2)-O(15)     | 90.8(3)    | O(5)-Tb(1)-O(12)#4    | 72.1(2)    |
| O(18)-U(2)-O(15)     | 89.4(3)    | O(10)-Tb(1)-O(12)#4   | 143.5(2)   |
| O(17)-U(2)-O(3)#4    | 90.4(2)    | O(13)#4-Tb(1)-O(12)#4 | 73.03(19)  |
| O(18)-U(2)-O(3)#4    | 88.8(2)    | O(2W)-Tb(1)-O(12)#4   | 71.3(2)    |
| O(15)-U(2)-O(3)#4    | 90.9(2)    | O(3W)-Tb(1)-O(12)#4   | 132.0(2)   |
| O(17)-U(2)-O(8)#3    | 89.9(2)    | O(1W)-Tb(1)-O(12)#4   | 69.4(2)    |
| O(18)-U(2)-O(8)#3    | 90.9(2)    | O(5)-Tb(1)-O(4W)      | 72.7(2)    |
| O(15)-U(2)-O(8)#3    | 85.8(2)    | O(10)-Tb(1)-O(4W)     | 74.6(2)    |
| O(3)#4-U(2)-O(8)#3   | 176.7(2)   | O(13)#4-Tb(1)-O(4W)   | 146.3(2)   |
| O(17)-U(2)-O(4)      | 92.5(2)    | O(2W)-Tb(1)-O(4W)     | 73.1(2)    |
| O(18)-U(2)-O(4)      | 87.4(2)    | O(3W)-Tb(1)-O(4W)     | 70.0(2)    |
| O(15)-U(2)-O(4)      | 174.0(2)   | O(1W)-Tb(1)-O(4W)     | 131.0(2)   |
| O(3)#4-U(2)-O(4)     | 94.1(2)    | O(12)#4-Tb(1)-O(4W)   | 131.1(2)   |

Symmetry transformations used to generate equivalent atoms: Symmetry



transformations used to generate equivalent atoms:

For **1**: #1 -x, -y, -z+1; #2 -x, -y, -z+2; #3 x+1, y, z; #4 x-1, y, z.

For **2**: #1 -x, -y, -z+1; #2 -x, -y, -z+2; #3 x+1, y, z; #4 x-1, y, z.

For **3-5**: #1 -x+3, -y+1, -z+3; #2 x+1, y, z+1; #3 -x+2, -y+1, -z+2; #4 -x+2, -y+1, -z+1; #5 x-1, y, z-1.

Table S3. Analysis of Short Ring-Interactions with Cg-Cg Distances < 6.0 Angstrom and Beta < 60.0Deg.

- Cg(I) = Plane number I (= ring number in () above)
- Alpha = Dihedral Angle between Planes I and J (Deg)
- Beta = Angle Cg(I)-->Cg(J) or Cg(I)-->Me vector and normal to plane I (Deg)
- Gamma = Angle Cg(I)-->Cg(J) vector and normal to plane J (Deg)
- Cg-Cg = Distance between ring Centroids (Ang.)
- CgI\_Perp = Perpendicular distance of Cg(I) on ring J (Ang.)
- CgJ\_Perp = Perpendicular distance of Cg(J) on ring I (Ang.)
- Slippage = Distance between Cg(I) and Perpendicular Projection of Cg(J) on Ring I (Ang).

| Cg(I)···Cg(J)     | Cg···Cg   | Alpha | Beta | Gamma | CgI_Perp | CgJ_Perp | Slippage |
|-------------------|-----------|-------|------|-------|----------|----------|----------|
| <b>Compound 1</b> |           |       |      |       |          |          |          |
| Cg(1)···Cg(1)#1   | 5.1955    | 0     | 14.4 | 14.4  | -5.0331  | -5.0331  | 1.289    |
| <b>Compound 2</b> |           |       |      |       |          |          |          |
| Cg(1)···Cg(2)     | 5.4817(3) | 8     | 47.8 | 56.2  | 3.0467   | -3.6838  | 4.059    |
| Cg(1)···Cg(2)#1   | 5.6139(4) | 8     | 28.6 | 21.4  | -5.2281  | -4.9293  | 2.686    |
| Cg(1)···Cg(2)#2   | 5.3763(3) | 8     | 39.8 | 35.9  | 4.3545   | 4.1280   | 3.444    |
| Cg(1)···Cg(3)#3   | 5.2145(3) | 24    | 58.2 | 36.0  | 4.2210   | 2.7513   |          |
| Cg(2)···Cg(1)     | 5.4817(3) | 8     | 56.2 | 47.8  | -3.6838  | 3.0467   | 4.557    |
| Cg(2)···Cg(1)#1   | 5.6139(4) | 8     | 21.4 | 28.6  | -4.9293  | -5.2281  | 2.045    |
| Cg(2)···Cg(1)#2   | 5.3763(3) | 8     | 35.9 | 39.8  | 4.1280   | 4.3545   | 3.153    |
| Cg(3)···Cg(1)#3   | 5.2145(3) | 24    | 36.0 | 58.2  | 2.7513   | 4.2210   |          |
| Cg(3)···Cg(2)#4   | 5.2691(3) | 32    | 31.4 | 63.4  | -2.3580  | -4.4976  |          |
| Cg(3)···Cg(3)#5   | 4.8984(3) | 0     | 47.9 | 47.9  | -3.2820  | -3.2820  | 3.636    |
| Cg(3)···Cg(3)#6   | 5.2765(3) | 0     | 51.5 | 51.5  | 3.2823   | 3.2823   | 4.131    |
| <b>Compound 3</b> |           |       |      |       |          |          |          |
| Cg(1)···Cg(1)#1   | 5.4163    | 16    | 41.8 | 31.9  | 4.5997   | -4.0402  |          |
| Cg(1)···Cg(1) #2  | 5.4163    | 16    | 31.9 | 41.8  | -4.0402  | 4.5997   |          |
| Cg(1)···Cg(2) #3  | 5.3388    | 25    | 40.9 | 64.9  | -2.2664  | -4.0378  |          |
| Cg(1)···Cg(3)     | 5.7577    | 20    | 53.6 | 33.9  | 4.7778   | 3.4162   |          |
| Cg(2)···Cg(2) #4  | 5.5861    | 6     | 23.1 | 29.0  | 4.8856   | -5.1377  |          |
| Cg(2)···Cg(2) #5  | 5.5861    | 6     | 29.0 | 23.1  | -5.1377  | 4.8856   |          |
| Cg(3)···Cg(1)     | 5.7577    | 20    | 33.9 | 53.6  | 3.4162   | 4.7778   |          |
| Cg(3)···Cg(2) #6  | 4.9652    | 44    | 31.1 | 70.5  | 1.6544   | -4.2508  |          |
| Cg(3)···Cg(3) #1  | 5.0630    | 14    | 51.4 | 49.8  | -3.2676  | 3.1605   |          |

|                   |           |    |      |      |         |         |       |
|-------------------|-----------|----|------|------|---------|---------|-------|
| Cg(3)···Cg(3) #2  | 5.0630    | 14 | 49.8 | 51.4 | 3.1605  | -3.2676 |       |
| <b>Compound 4</b> |           |    |      |      |         |         |       |
| Cg(1)···Cg(1)#1   | 5.4079(2) | 16 | 41.4 | 31.6 | 4.6074  | -4.0593 | 3.573 |
| Cg(1)···Cg(1) #2  | 5.4079(2) | 16 | 31.6 | 41.4 | -4.0593 | 4.6074  | 2.831 |
| Cg(1)···Cg(2) #3  | 5.3255(2) | 25 | 41.1 | 64.9 | -2.2560 | -4.0152 |       |
| Cg(1)···Cg(3)     | 5.7406(2) | 20 | 53.7 | 33.4 | 4.7902  | 3.4013  |       |
| Cg(2)···Cg(2) #4  | 5.5780(2) | 6  | 23.0 | 28.9 | 4.8852  | -5.1351 | 2.178 |
| Cg(2)···Cg(2) #5  | 5.5780(2) | 6  | 28.9 | 23.0 | -5.1351 | 4.8852  | 2.692 |
| Cg(3)···Cg(1)     | 5.7406(2) | 20 | 33.4 | 53.7 | 3.4013  | 4.7902  |       |
| Cg(3)···Cg(2) #6  | 4.9867(2) | 45 | 30.9 | 70.8 | 1.6387  | -4.2791 |       |
| Cg(3)···Cg(3) #1  | 5.0601(2) | 14 | 51.5 | 50.0 | -3.2528 | 3.1473  | 3.962 |
| Cg(3)···Cg(3) #2  | 5.0601(2) | 14 | 50.0 | 51.5 | 3.1473  | -3.2528 | 3.876 |
| <b>Compound 5</b> |           |    |      |      |         |         |       |
| Cg(1)···Cg(1)#1   | 5.3897(2) | 16 | 40.5 | 30.4 | 4.6510  | -4.0973 | 3.502 |
| Cg(1)···Cg(1) #2  | 5.3897(2) | 16 | 30.4 | 40.5 | -4.0973 | 4.6510  | 2.724 |
| Cg(1)···Cg(2) #3  | 5.3188(2) | 23 | 42.1 | 64.8 | -2.2673 | -3.9447 |       |
| Cg(1)···Cg(3)     | 5.7249(2) | 21 | 54.6 | 33.6 | 4.7687  | 3.3203  |       |
| Cg(2)···Cg(2) #4  | 5.5644(2) | 6  | 23.0 | 28.8 | 4.8749  | -5.1223 | 2.174 |
| Cg(2)···Cg(2) #5  | 5.5644(2) | 6  | 28.8 | 23.0 | -5.1223 | 4.8749  | 2.683 |
| Cg(3)···Cg(1)     | 5.7249(2) | 21 | 33.6 | 54.6 | 3.3203  | 4.7687  |       |
| Cg(3)···Cg(2) #6  | 4.9898(2) | 44 | 31.5 | 70.9 | 1.6312  | -4.2543 |       |
| Cg(3)···Cg(3) #1  | 5.0502(2) | 14 | 51.2 | 49.5 | -3.2827 | 3.1674  | 3.933 |
| Cg(3)···Cg(3) #2  | 5.0502(2) | 14 | 49.5 | 51.2 | 3.1674  | -3.2827 | 3.838 |

For **2**: #1: = -X, 1-Y, -Z; #2: 1-X, 1-Y, -Z; #3: -X, -Y, 1-Z; #4: -X, -Y, -Z; #5: -1-X, -1-Y, 1-Z; #6: -X, -1-Y, 1-Z.

For **3-5**: #1: X, 1/2-Y, -1/2+Z; #2: X, 1/2-Y, 1/2+Z; #3: 2-X, -Y, 2-Z; #4: X, -1/2-Y, -1/2+Z; #5: X, -1/2-Y, 1/2+Z; #6: 1-X, -Y, 2-Z

For **1**: Cg (1): C(1)-C(2)-C(3)-C(4)-C(5)-C(6)→

For **2**:

Cg (1): C(1)-C(2)-C(3)-C(4)-C(5)-C(6)→

Cg (2): C(8)-C(9)-C(10)-C(11)-C(12)-C(13)→

Cg (3): C(15)-C(16)-C(17)-C(18)-C(19)-C(20)→

For **3-5**:

Cg (1): C(2)-C(3)-C(4)-C(5)-C(6)-C(7)→

Cg (2): C(9)-C(10)-C(11)-C(12)-C(13)-C(14)→

Cg (3): C(16)-C(17)-C(18)-C(19)-C(20)-C(21)→

Table S4. Hydrogen bonds in compounds **1-5**.

| Donor-H···Acceptor   | D-H  | H···A | D···A  | D-H···A |
|----------------------|------|-------|--------|---------|
| <b>Compound 1</b>    |      |       |        |         |
| O(1W)-H(1W)···O(2)#1 | 0.85 | 2.54  | 2.8245 | 100     |
| O(1W)-H(1W)···O(3)#1 | 0.85 | 1.93  | 2.7449 | 161     |
| O(1W)-H(2W)···O(2)   | 0.85 | 2.03  | 2.7994 | 149     |

|                        |      |      |           |     |
|------------------------|------|------|-----------|-----|
| O(2W)-H(4W)···O(5)#2   | 0.85 | 2.08 | 2.8519    | 150 |
| C(1)-H(1A)···O(4)      | 0.93 | 2.56 | 2.9140    | 103 |
| C(2)-H(2A)···O(7)#3    | 0.93 | 2.59 | 3.2596    | 129 |
| <b>Compound 2</b>      |      |      |           |     |
| O1W-H1W···O2           | 0.85 | 2.14 | 2.7068(2) | 124 |
| O1W-H2W···O16#1        | 0.85 | 2.08 | 2.9246(2) | 170 |
| O2W-H4W···O1W          | 0.85 | 2.49 | 2.9646(2) | 116 |
| O3W-H5W···O5W#2        | 0.85 | 1.91 | 2.7424(2) | 167 |
| O3W-H6W···O18#3        | 0.85 | 2.42 | 2.9657(2) | 123 |
| O4W-H7W···O17          | 0.85 | 2.33 | 2.7338(2) | 109 |
| O5W-H10W···O14#1       | 0.85 | 2.50 | 3.3359(2) | 167 |
| O5W-H10W···O15#1       | 0.85 | 2.40 | 2.9027(2) | 119 |
| C1-H1A···O2            | 0.93 | 2.55 | 2.8952(2) | 103 |
| C4-H4A···O11#4         | 0.93 | 2.52 | 3.2816(2) | 139 |
| C7-H7B···O6            | 0.97 | 2.21 | 3.1752(2) | 171 |
| C11-H11A···O16#5       | 0.93 | 2.51 | 3.2790(2) | 140 |
| C12-H12A···O6          | 0.93 | 2.52 | 2.8945(2) | 104 |
| C14-H14B···O11#6       | 0.97 | 2.37 | 3.2388(2) | 149 |
| C19-H19A···O11         | 0.93 | 2.41 | 2.8091(2) | 106 |
| C21-H21A···O1#3        | 0.97 | 2.46 | 3.2483(2) | 139 |
| <b>Compound 3</b>      |      |      |           |     |
| O(1W)-H(1W)···O(5W)    | 0.85 | 1.91 | 2.7144    | 156 |
| O(1W)-H(2W)···O(16)#1  | 0.85 | 2.11 | 2.9604    | 174 |
| O(2W)-H(3W)···O(1)     | 0.85 | 1.96 | 2.6818    | 142 |
| O(2W)-H(4W)···O(18)#1  | 0.85 | 1.99 | 2.6900    | 139 |
| O(3W)-H(5W)···O(7)#1   | 0.85 | 2.37 | 2.7506    | 107 |
| O(3W)-H(6W)···O(17)    | 0.85 | 2.22 | 2.9338    | 141 |
| O(4W)-H(7W)···O(5)     | 0.85 | 2.38 | 2.9003    | 120 |
| O(4W)-H(8W)···O(2)#2   | 0.85 | 2.49 | 3.2960    | 159 |
| O(5W)-H(9W)···O(13)#3  | 0.85 | 2.14 | 2.8669    | 144 |
| O(5W)-H(10W)···O(6)#4  | 0.85 | 2.37 | 3.0019    | 132 |
| C(1)-H(1A)···O(11)     | 0.97 | 2.36 | 3.2347    | 150 |
| C(7)-H(7A)···O(1)      | 0.93 | 2.53 | 2.8904    | 103 |
| C(8)-H(8B)···O(2)#5    | 0.97 | 2.33 | 3.2609    | 160 |
| C(10)-H(10A)···O(6)    | 0.93 | 2.55 | 2.9116    | 104 |
| C(13)-H(13A)···O(17)#6 | 0.93 | 2.57 | 3.2848    | 135 |
| C(15)-H(15B)···O(6)#4  | 0.97 | 2.41 | 3.2187    | 141 |
| C(19)-H(19A)···O(16)#7 | 0.93 | 2.42 | 3.2909    | 157 |
| C(21)-H(21A)···O(11)   | 0.93 | 2.50 | 2.8883    | 105 |
| <b>Compound 4</b>      |      |      |           |     |
| O(1W)-H(1W)···O(10)#1  | 0.85 | 1.90 | 2.7057(1) | 157 |
| O(1W)-H(2W)···O(16) #1 | 0.85 | 2.13 | 2.9730(1) | 174 |

|                         |      |      |           |     |
|-------------------------|------|------|-----------|-----|
| O(2W)-H(3W)···O(1)      | 0.85 | 1.97 | 2.6867(1) | 142 |
| O(2W)-H(4W)···O(18) #1  | 0.85 | 1.99 | 2.6925(1) | 139 |
| O(3W)-H(5W)···O(7) #1   | 0.85 | 2.35 | 2.7279(1) | 107 |
| O(3W)-H(6W)···O(17)     | 0.85 | 2.25 | 2.9605(1) | 142 |
| O(4W)-H(7W)···O(5)      | 0.85 | 2.37 | 2.8827(1) | 119 |
| O(4W)-H(8W)···O(2) #2   | 0.85 | 2.50 | 3.3060(1) | 160 |
| O(5W)-H(9W)···O(13) #3  | 0.85 | 2.14 | 2.8706(1) | 143 |
| O(5W)-H(10W)···O(1W)    | 0.85 | 2.35 | 2.9871(1) | 132 |
| C(1)-H(1A)···O(11)      | 0.97 | 2.36 | 3.2391(1) | 150 |
| C(7)-H(7A)···O(1)       | 0.93 | 2.53 | 2.8901(1) | 104 |
| C(8)-H(8B)···O(2) #4    | 0.97 | 2.33 | 3.2608(1) | 160 |
| C(10)-H(10A)···O(6)     | 0.93 | 2.54 | 2.9150(1) | 104 |
| C(13)-H(13A)···O(17) #5 | 0.93 | 2.57 | 3.2968(1) | 136 |
| C(15)-H(15B)···O(6) #6  | 0.97 | 2.40 | 3.2134(1) | 141 |
| C(19)-H(19A)···O(16) #7 | 0.93 | 2.40 | 3.2927(1) | 160 |
| C(21)-H(21A)···O(11)    | 0.93 | 2.48 | 2.8735(1) | 105 |
| <b>Compound 5</b>       |      |      |           |     |
| O1W-H1W···O5W           | 0.85 | 1.90 | 2.7018(1) | 157 |
| O1W-H2W···O16#1         | 0.85 | 2.13 | 2.9754(1) | 175 |
| O2W-H3W···O1            | 0.85 | 1.97 | 2.6910(1) | 142 |
| O2W-H3W···O12           | 0.85 | 2.58 | 2.8680(1) | 101 |
| O2W-H4W···O18#1         | 0.85 | 1.97 | 2.6744(1) | 140 |
| O3W-H5W···O7#1          | 0.85 | 2.34 | 2.7170(1) | 107 |
| O3W-H5W···O13           | 0.85 | 2.58 | 2.9292(1) | 106 |
| O3W-H6W···O17           | 0.85 | 2.26 | 2.9773(1) | 142 |
| O4W-H7W···O5            | 0.85 | 2.36 | 2.8624(1) | 119 |
| O4W-H8W···O2#2          | 0.85 | 2.49 | 3.3027(1) | 160 |
| O5W-H9W···O13#3         | 0.85 | 2.15 | 2.8766(1) | 143 |
| O5W-H10W···O6#4         | 0.85 | 2.36 | 2.9916(1) | 132 |
| C1-H1A···O11            | 0.97 | 2.35 | 3.2266(1) | 149 |
| C7-H7A···O1             | 0.93 | 2.53 | 2.8983(1) | 104 |
| C8-H8B···O2#5           | 0.97 | 2.35 | 3.2706(1) | 159 |
| C10-H10A···O6           | 0.93 | 2.53 | 2.9074(1) | 104 |
| C13-H13A···O17#6        | 0.93 | 2.56 | 3.2860(1) | 136 |
| C15-H15B···O6#4         | 0.97 | 2.40 | 3.2166(1) | 141 |

|                  |      |      |           |     |
|------------------|------|------|-----------|-----|
| C19-H19A...O16#7 | 0.93 | 2.37 | 3.2648(1) | 160 |
| C21-H21A...O11   | 0.93 | 2.50 | 2.8899(1) | 106 |

Translation of ARU-Code to CIF and Equivalent Position Code

For **1**: #1: -x, -1/2+y, 1/2-z; #2: -x, 1-y, -z; #3: 1+x, y, z;

For **2**: #1: 1+x, y, z; #2: x, 1+y, z; #3: -x, 1-y, -z; #4: -x, -y, -z; #5: -x, -y, 1-z.

For **3-5**: #1: x, y, -1+z; #2: 2-x, -y, 1-z; #3: 1-x, -y, 1-z; #4: 2-x, -y, 2-z; #5: x, -1/2-y, 1/2+z; #6: 1-x, -y, 2-z; #7: x, 1/2-y, -1/2+z.

Table S5. Analysis of Y-X...Cg(Pi-Ring) Interactions (X...Cg < 4.0 Ang. - Gamma < 30.0 Deg)

| Compound 2           |           |        |       |           |           |          |
|----------------------|-----------|--------|-------|-----------|-----------|----------|
| Y--X(I)...Cg(J)      | X...Cg    | X-Perp | Gamma | Y-X...Cg  | Y...Cg    | Y-X...Pi |
| S(1)-O(2)...Cg(2)#1  | 3.8446(2) | 3.683  | 16.67 | 124.88(1) | 4.8239(3) | 33.04    |
| S(2)-O(7)...Cg(1)#1  | 3.7934(2) | 3.486  | 23.23 | 123.76(1) | 4.7211(3) | 24.59    |
| Compound 3           |           |        |       |           |           |          |
| C(10)-H(10A)→Cg(3)#1 | 2.98      | -2.90  | 13.82 | 140       | 3.7443    | 36       |
| S(2)-O(7)...Cg(2)#2  | 3.9241    | -3.700 | 19.45 | 124       | 4.8743    | 45.52    |
| Compound 4           |           |        |       |           |           |          |
| S(2)-O(7)...Cg(2)#2  | 3.9172(1) | -3.688 | 19.70 | 124.18(1) | 4.8698(2) | 45.78    |
| Compound 5           |           |        |       |           |           |          |
| S(2)-O(7)...Cg(2)#2  | 3.8957(1) | -3.666 | 19.78 | 124.60(1) | 4.8580(2) | 46.16    |

For **2**: #1= 1-x, 1-y, -z; For **3-5**: #1 = 1-x, -y, 2-z; #2 = x, -1/2-y, 1/2+z.

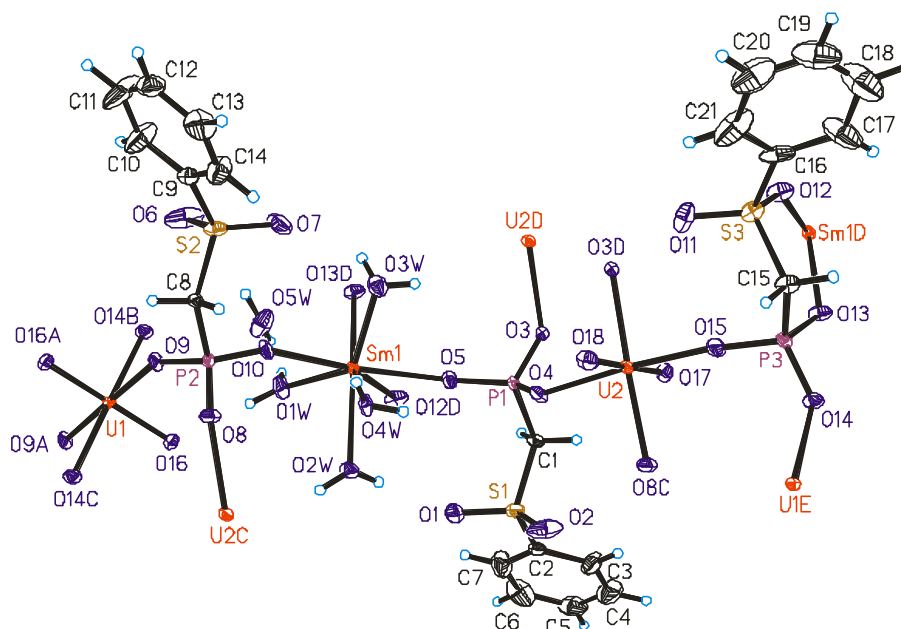

Figure S7 Depiction of the coordination environments of the phosphonate ligand, uranyl and samarium cations in **3** (thermal ellipsoids are given at 30% probability). A: 3-x, 1-y, 3-z; B: 1+x, y, 1+z; C: 2-x, 1-y, 2-z; D: 2-x, 1-y, 1-z; E: -1+x, y, -1+z.

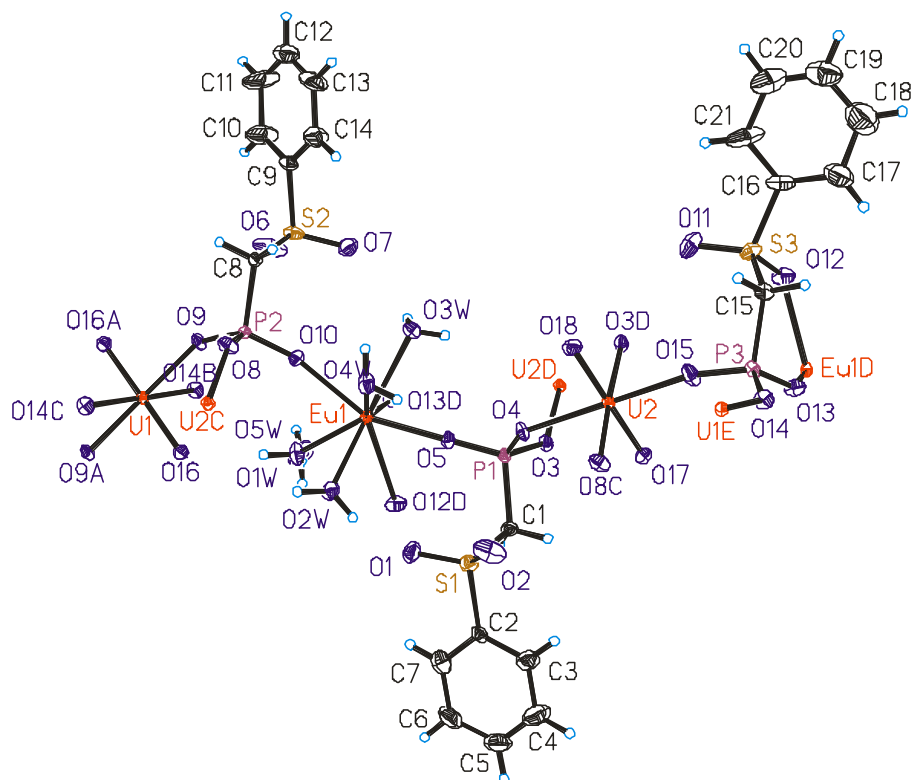

Figure S8 Depiction of the coordination environments of the phosphonate ligand, uranyl and samarium cations in **4** (thermal ellipsoids are given at 30% probability). A: 3-x, 1-y, 3-z; B: 1+x, y, 1+z; C: 2-x, 1-y, 2-z; D: 2-x, 1-y, 1-z; E: -1+x, y, -1+z.

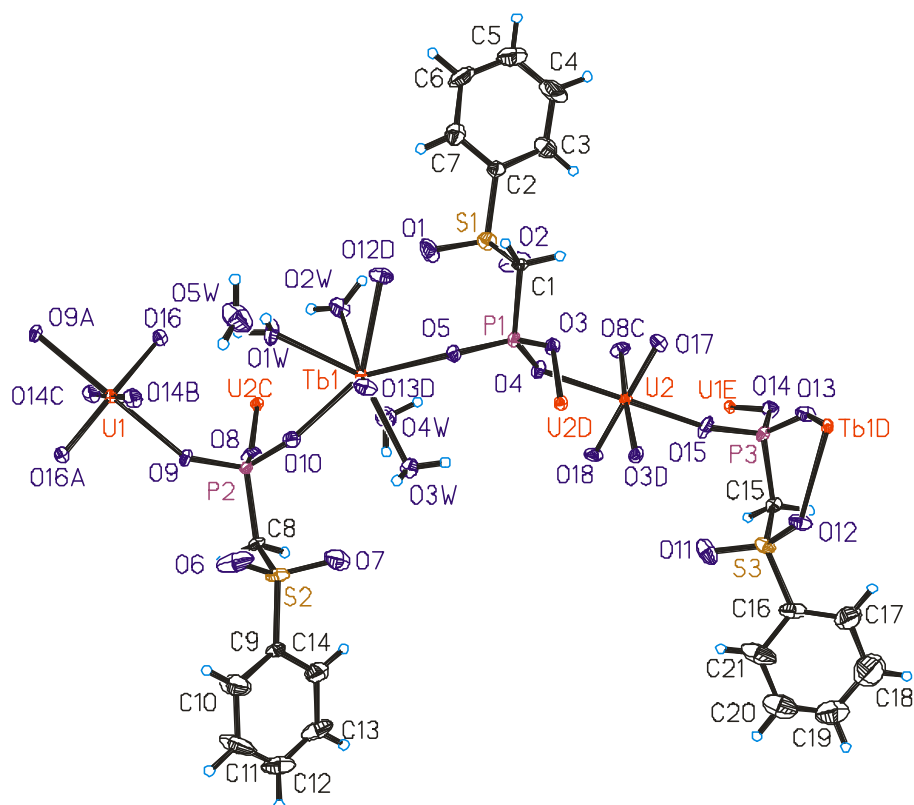

Figure S9 Depiction of the coordination environments of the phosphonate ligand, uranyl and samarium cations in **5** (thermal ellipsoids are given at 30% probability). A:  $3-x, 1-y, 3-z$ ; B:  $1+x, y, 1+z$ ; C:  $2-x, 1-y, 2-z$ ; D:  $2-x, 1-y, 1-z$ ; E:  $-1+x, y, -1+z$ .

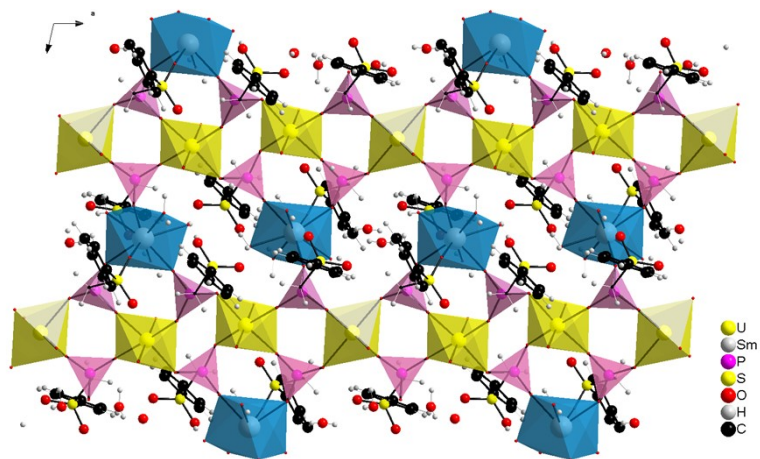

(a)

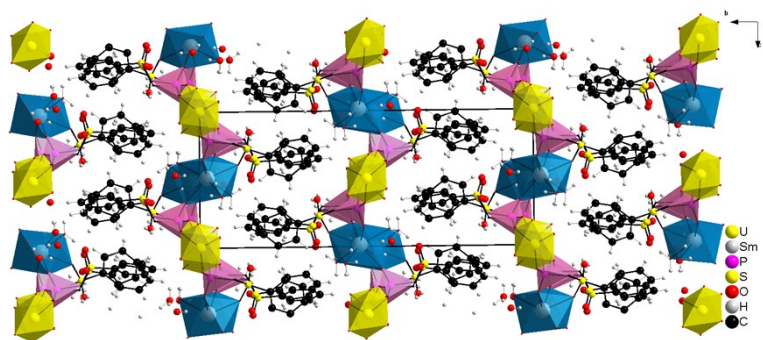

(b)

**Figure S10** Two-dimensional layer (a) in *ac*-plane and three-dimensional stacking crystal structure along *a*-direction (b) of compound **3**.

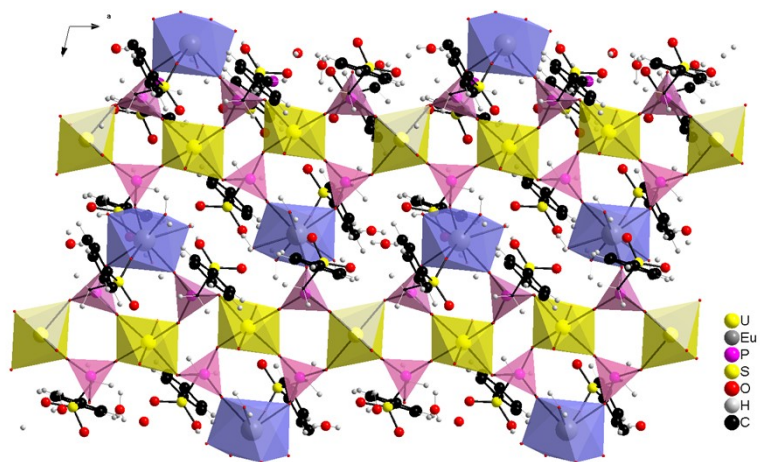

(a)

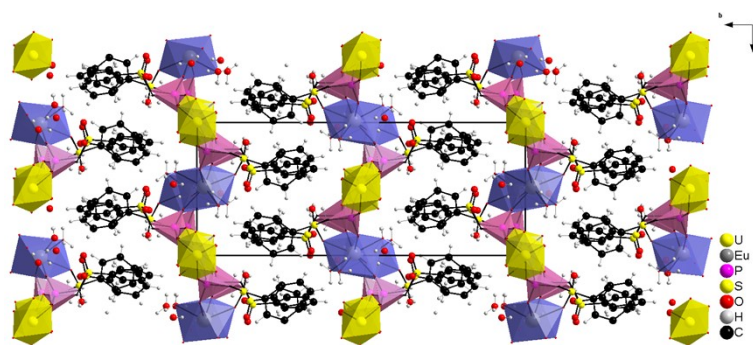

(b)

**Figure S11** Two-dimensional layer (a) in *ac*-plane and three-dimensional stacking crystal structure along *a*-direction (b) of compound **4**.

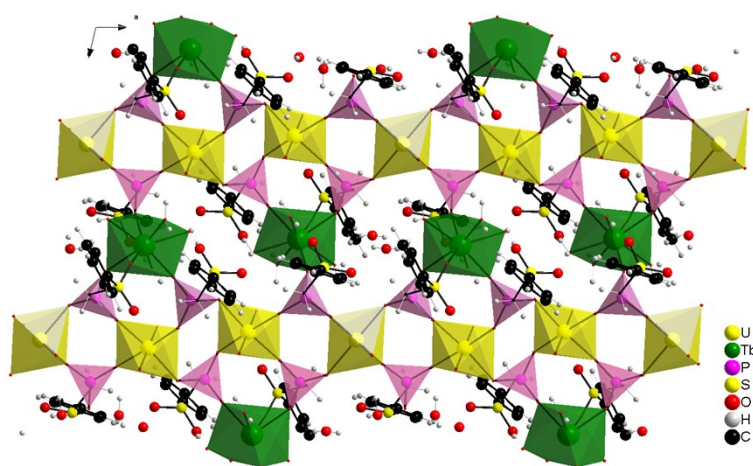

(a)

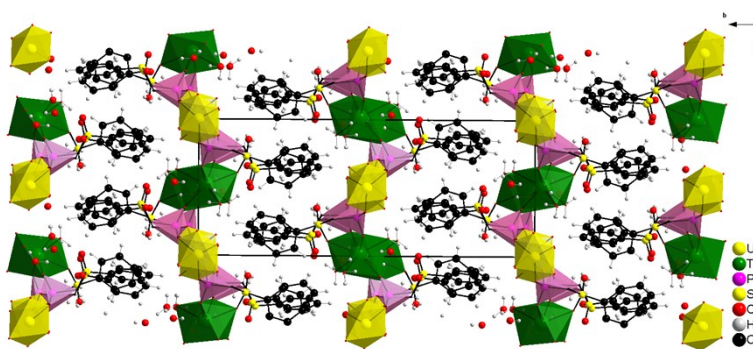

(b)

**Figure S12** Two-dimensional layer (a) in *ac*-plane and three-dimensional stacking crystal structure along *a*-direction (b) of compound **5**.



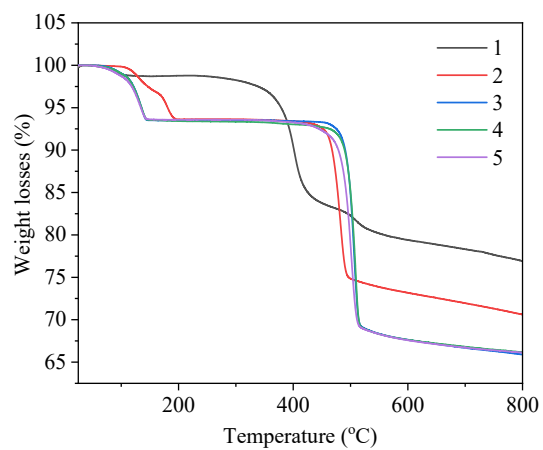

**Figure S13** TGA curves of compounds **1-5**.

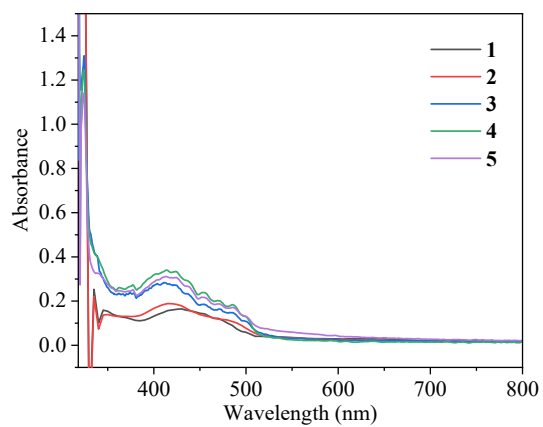

**Figure S14** UV-Vis absorption spectra of compounds **1-5**.

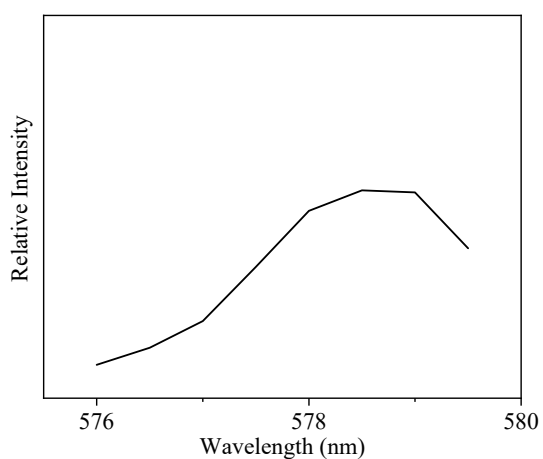

**Figure S15** The  $^5D_0 \rightarrow ^7F_0$  transition on the emission spectrum of compound **4**.

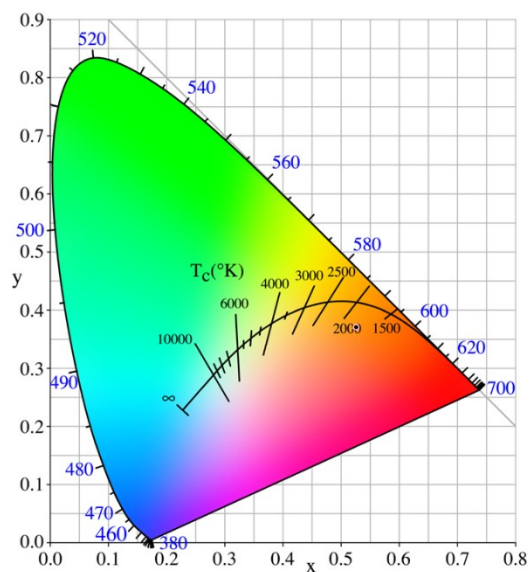

**Figure S16** CIE diagram of compound **4** under excitation of 365 nm.

REFERENCES:

- [1] SAINT, Version 6.45; Bruker Analytical X-ray Systems Inc.: 2003.
- [2] Sheldrick, G. M. SADABS, Version 2.10; Bruker AXS Inc.: Madison, WI, 2003.
- [3] Sheldrick, G. M. SHELXS-97, Program for Crystal Structure Solution and Refinement; University of Göttingen, 1997.
- [4] Sheldrick, G. M. *SHELXL* 2013 (Univ. Göttingen, 2013).
